# Supplementary material
Source: PubMed Central journal article supplement (PMC7294194)

## **Supplementary material**

**Title:** The first 6 weeks – setting up an UK urgent dental care centre during the COVID-19 pandemic.

**Authors:** Emily Carter<sup>1,2</sup>, Charlotte Currie<sup>1,2</sup>, Abisola Asuni<sup>1</sup>, Rachel Goldsmith<sup>1</sup>, Grace Toon<sup>1</sup>, Catherine Horridge<sup>1</sup>, Sarah Simpson<sup>1</sup>, Chris Donnell<sup>1</sup>, Mark Greenwood<sup>1,2</sup>, Graham Walton<sup>1</sup>, Ben Cole<sup>1,2</sup>, Justin Durham<sup>1,2</sup>, Richard Holliday<sup>1,2\*</sup>.

1. Newcastle Hospitals NHS Foundation Trust, Newcastle upon Tyne, UK
2. School of Dental Sciences, Newcastle University, Newcastle upon Tyne, UK

## Contents

1. Detailed patient demographics
2. Ethnicity of patients attending clinical consultations
3. Patient journeys and GDP registration status for clinical visits by week
4. Triage and clinical diagnoses and outcomes by week
5. COVID-19 status weekly graphs

### Summary of patient demographics

|                    | <b>Triage Consultation,<br/>n (%)</b> | <b>Clinical<br/>Consultation, n (%)</b> | <b>Total, n (%)</b> |
|--------------------|---------------------------------------|-----------------------------------------|---------------------|
| <b>Age (years)</b> |                                       |                                         |                     |
| <16                | 271 (16)                              | 168 (13)                                | 439 (14)            |
| 17-24              | 177 (10)                              | 137 (10)                                | 314 (10)            |
| 25-34              | 385 (22)                              | 315 (24)                                | 700 (23)            |
| 35-44              | 273 (16)                              | 197 (15)                                | 470 (15)            |
| 45-54              | 298 (17)                              | 238 (18)                                | 536 (17)            |
| 55-64              | 201 (12)                              | 167 (13)                                | 368 (12)            |
| 65-74              | 99 (5)                                | 66 (5)                                  | 165 (6)             |
| 75+                | 42 (2)                                | 34 (2)                                  | 76 (3)              |
| <b>Gender</b>      |                                       |                                         |                     |
| Male               | 870 (50)                              | 659 (50)                                | 1529 (50)           |
| Female             | 875 (50)                              | 661 (50)                                | 1536 (50)           |
| Data not available | 1 (0)                                 | 2 (0)                                   | 3 (0)               |



### **Patient journeys and GDP registration status for clinical visits by week**

|                                                                         | Week of clinical service |                        |                       |                       |                       |                      | Total                    |
|-------------------------------------------------------------------------|--------------------------|------------------------|-----------------------|-----------------------|-----------------------|----------------------|--------------------------|
|                                                                         | 1                        | 2                      | 3                     | 4                     | 5                     | 6                    |                          |
| <b>Distance travelled for clinical visits, km</b>                       |                          |                        |                       |                       |                       |                      |                          |
| Mean                                                                    | 22                       | 25                     | 27                    | 29                    | 26                    | 17                   | 25                       |
| SD                                                                      | 26                       | 23                     | 25                    | 26                    | 21                    | 16                   | 23                       |
| Range                                                                   | 0-188                    | 0-161                  | 3-160                 | 3-206                 | 3-97                  | 0-79                 | 0-206                    |
| <b>GDP registration status n, (%)</b>                                   |                          |                        |                       |                       |                       |                      |                          |
| No GDP                                                                  | 68 (30)                  | 41 (16)                | 19 (8)                | 26 (7)                | 33 (9)                | 25 (8)               | 212 (12)                 |
| Registered, advice not sought                                           | 36 (16)                  | 35 (14)                | 26 (12)               | 64 (18)               | 77 (21)               | 53 (17)              | 291 (17)                 |
| Registered, advice sought [of these, advice not received or inadequate] | 94 (42)<br>[13(14%)]     | 165 (64)<br>[78 (47%)] | 167 (75)<br>[1 (<1%)] | 246 (70)<br>[13 (5%)] | 243 (66)<br>[16 (7%)] | 211 (68)<br>[9 (4%)] | 1126 (65)<br>[130 (12%)] |
| Data not recorded/unknown                                               | 28 (12)                  | 16 (6)                 | 12 (5)                | 16 (5)                | 18 (4)                | 22 (7)               | 112 (6)                  |
| <b>Advice, Analgesics and Antimicrobials (AAA) status n, (%)</b>        |                          |                        |                       |                       |                       |                      |                          |
| Followed AAA strategy, but failed                                       | 13 (32)                  | 24 (38)                | 45 (78)               | 64 (70)               | 45 (64)               | 54 (52)              | 245 (57)                 |
| AA, no antimicrobials                                                   | 21 (51)                  | 27 (42)                | 11 (19)               | 25 (28)               | 23 (33)               | 46 (45)              | 153 (36)                 |
| No AAA                                                                  | 3 (7)                    | 12 (18)                | 1 (<2)                | 2 (2)                 | 1 (<2)                | 2 (<2)               | 21 (5)                   |
| Data not available                                                      | 4 (10)                   | 1 (2)                  | 1 (<2)                | 0 (0)                 | 1 (<2)                | 1 (<1)               | 8 (2)                    |



## Triage outcome by week

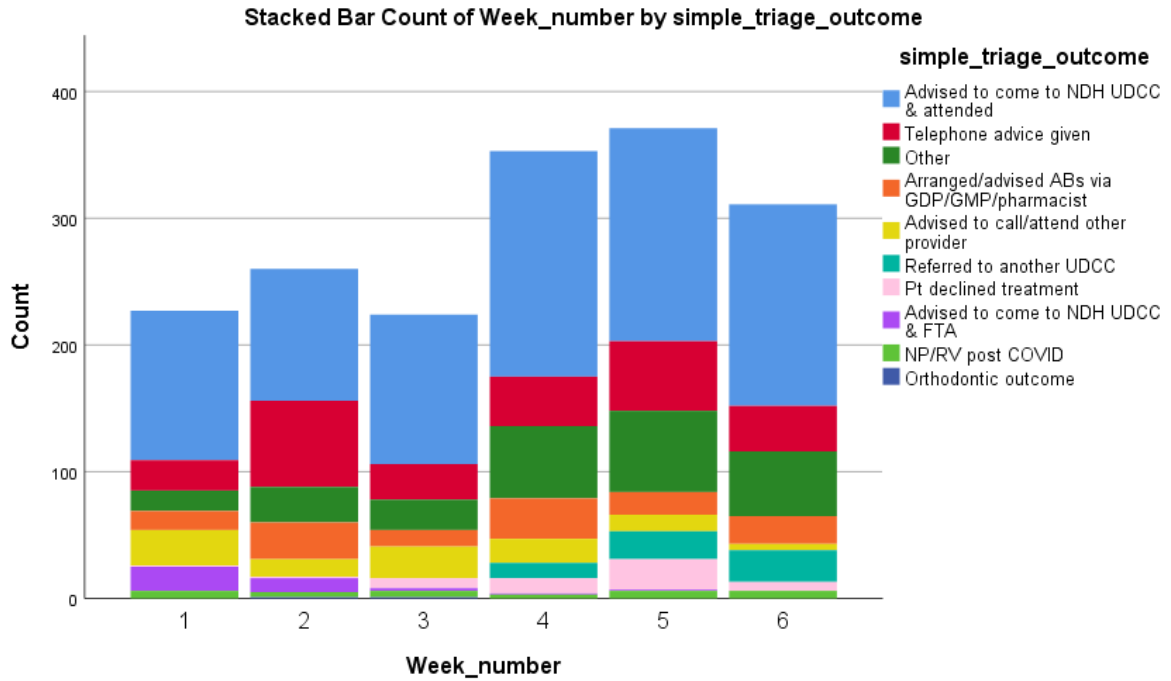

## Clinical outcomes by week

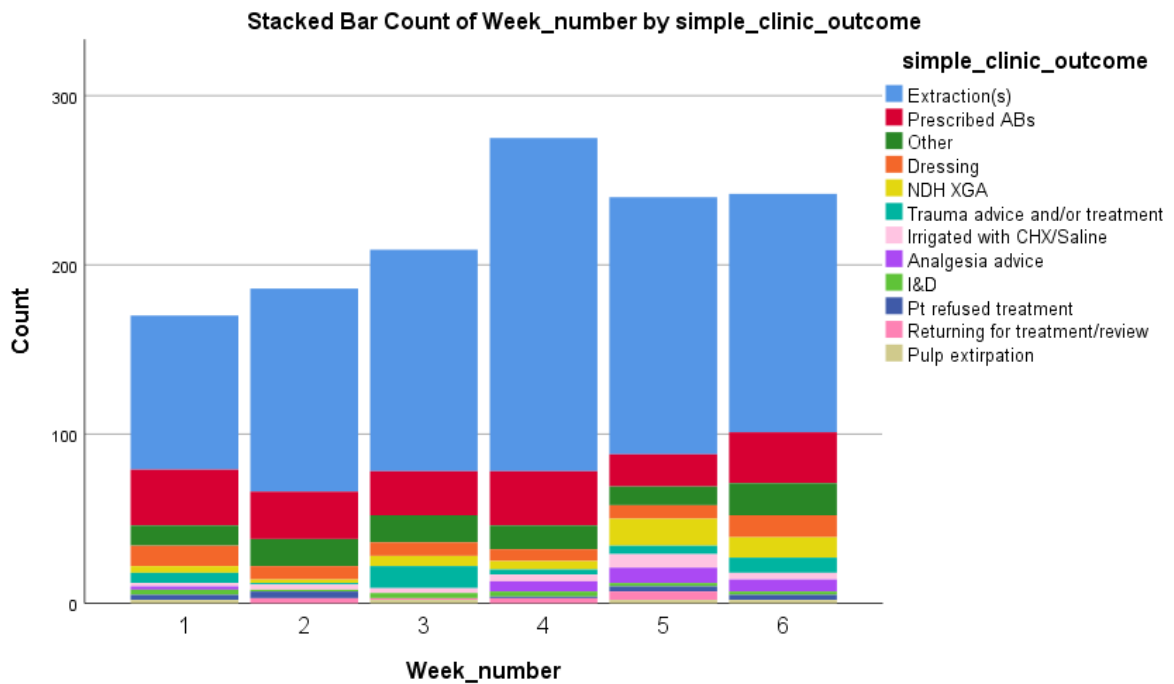

### COVID-19 triage status by week

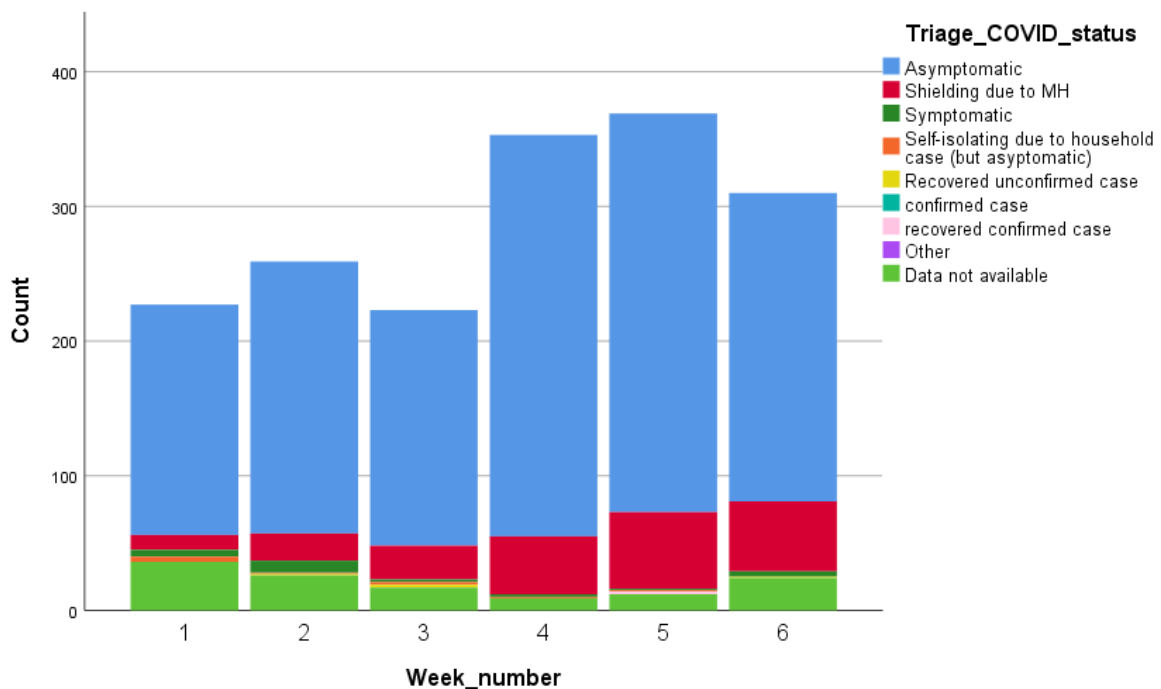

Footnote: Data sometimes not available as the triage telephone call determined the dental issue was unsuitable for a clinical visit and so the COVID-19 status was not recorded.

### COVID-19 status of those attending the clinical visit by week

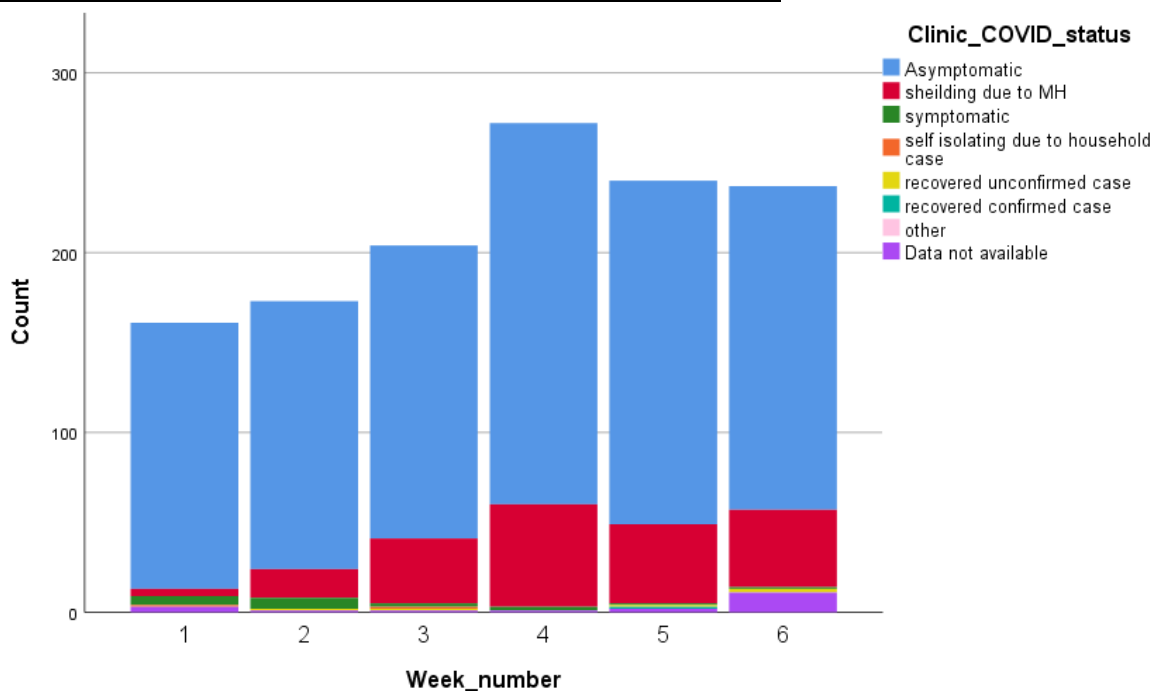

Supplement: 41415_2020_1708_MOESM1_ESM.pdf [file 41415_2020_1708_MOESM1_ESM.pdf]
